# Circulating MiR-125b as a Marker Predicting Chemoresistance in Breast Cancer

Hongjiang Wang\*, Guang Tan, Lei Dong, Lei Cheng, Kejun Li, Zhongyu Wang, Haifeng Luo

Department of General Surgery, First Affiliated Hospital of Dalian Medical University, Dalian, People's Republic of China

## Abstract

**Background:** Chemotherapy is an important component in the treatment paradigm for breast cancers. However, the resistance of cancer cells to chemotherapeutic agents frequently results in the subsequent recurrence and metastasis. Identification of molecular markers to predict treatment outcome is therefore warranted. The aim of the present study was to evaluate whether expression of circulating microRNAs (miRNAs) can predict clinical outcome in breast cancer patients treated with adjuvant chemotherapy.

**Methodology/Principal Findings:** Circulating miRNAs in blood serum prior to treatment were determined by quantitative Real-Time PCR in 56 breast cancer patients with invasive ductal carcinoma and pre-operative neoadjuvant chemotherapy. Proliferating cell nuclear antigen (PCNA) immunostaining and TUNEL were performed in surgical samples to determine the effects of chemotherapy on cancer cell proliferation and apoptosis, respectively. Among the miRNAs tested, only miR-125b was significantly associated with therapeutic response, exhibiting higher expression level in non-responsive patients ( $n = 26$ , 46%;  $p = 0.008$ ). In addition, breast cancers with high miR-125b expression had higher percentage of proliferating cells and lower percentage of apoptotic cells in the corresponding surgical specimens obtained after neoadjuvant chemotherapy. Increased resistance to anticancer drug was observed *in vitro* in breast cancer cells with ectopic miR-125b expression; conversely, reducing miR-125b level sensitized breast cancer cells to chemotherapy. Moreover, we demonstrated that the E2F3 was a direct target of miR-125b in breast cancer cells.

**Conclusions/Significance:** These data suggest that circulating miR-125b expression is associated with chemotherapeutic resistance of breast cancer. This finding has important implications in the development of targeted therapeutics for overcoming chemotherapeutic resistance in novel anti-cancer strategies.

**Citation:** Wang H, Tan G, Dong L, Cheng L, Li K, et al. (2012) Circulating MiR-125b as a Marker Predicting Chemoresistance in Breast Cancer. PLoS ONE 7(4): e34210. doi:10.1371/journal.pone.0034210

**Editor:** William C S. Cho, Queen Elizabeth Hospital, Hong Kong

**Received:** July 26, 2011; **Accepted:** February 28, 2012; **Published:** April 16, 2012

**Copyright:** © 2012 Wang et al. This is an open-access article distributed under the terms of the Creative Commons Attribution License, which permits unrestricted use, distribution, and reproduction in any medium, provided the original author and source are credited.

**Funding:** These studies were supported, in part, by grants from the National Natural Science Foundation of China (No.81141098). No additional external funding was received for this study. The funders had no role in study design, data collection and analysis, decision to publish, or preparation of the manuscript.

**Competing Interests:** The authors have declared that no competing interests exist.

\* E-mail: hjwang@dlmedu.edu.cn

## Introduction

Breast cancer is the leading cause of cancer and the second leading cause of cancer death in American women [1], and its incidence is increasing in many countries including China [2]. Chemotherapy is an important component in the treatment paradigm for breast cancers. However, despite a rapid shrinkage in tumor mass following chemotherapeutic cycles, the resistance of cancer cells to chemotherapeutic agents frequently results in the subsequent recurrence and metastasis of cancer [3]. To date, there is no validated sensitivity and/or resistance predictive factor available in clinical settings and the mechanisms involved in cancer cell chemoresistance are still largely unknown. Therefore, it is in urgent need to search for circulating markers and identify signaling pathways in breast cancer patients resistant to chemotherapy.

The molecular mechanisms that may contribute to chemotherapeutic resistance in breast cancers include overexpression of ATP-binding cassette transporters, anti-apoptotic factors and cell cycle deregulation [4–6]. However, targeting any single molecule is not sufficient to reverse chemotherapeutic resistance [7],

suggesting that multiple molecular pathways may contribute to the sensitivity of breast cancer cells to chemotherapy.

MicroRNAs (miRNAs) are a group of non-coding, single-stranded RNAs of ~22 nucleotides, which regulate gene expression by binding to the 3'-untranslated region (UTR) of target mRNAs, repressing mRNA translation or cleaving target mRNA [8]. As master regulators of gene expression, miRNAs are involved in modulating multiple cellular pathways, including cell proliferation, differentiation, and apoptosis, and thus may function as oncogenes or tumor suppressing genes [9,10]. Importantly, circulating miRNAs have been detected as potential blood-based biomarkers for cancer detection [11–14]. Among them, oncogenic miRNAs, including miR-10b [15], miR-34a [16], miR-125b [17], miR-155 [18] *etc.*, have been reported to be related to breast cancer. In recent years, some miRNAs have been reported to be involved in drug-resistance. Inhibition of miR-221 or miR-222 expression has been shown to sensitize MDA-MB-468 cells to tamoxifen-induced cell growth arrest and apoptosis [19]. Ectopic miR-34a expression resulted in cell cycle arrest and growth inhibition and attenuated chemoresistance to the anticancer drug, camptothecin, by inducing apoptosis [20]. To date, however, there

has been no report on the role of circulating miRNAs in chemotherapeutic resistance of breast cancers.

The aim of the present study was to evaluate potential biological markers to predict outcome from adjuvant chemotherapy. Therefore, we have performed an integrative analysis of the expression of miR-10b, miR-34a, miR-125b and miR-155 in the serum of advanced breast cancer patients, with known pathological and treatment characteristics. We identified an association of circulating miR-125b level with chemotherapeutic response. In addition, the effects of overexpression and knockdown of miR-125b on chemotherapeutic resistance was investigated by *in vitro* assays.

## Results

### Circulating miRNA expression profiles and correlation with clinical outcome

Expression of 4 miRNAs, miR-10b, -34a, -125b and -155, was profiled in the serum because of their established relevance to breast cancer [15–18]. Consistent with previous reports, the levels of miR-10b and miR-155 were significantly higher in the early stage (Stage II,  $n=35$ ) and late stage (Stage III,  $n=21$ ) breast cancer patients than in healthy controls ( $n=10$ ) (Fig. 1). In addition, the late stage breast cancer patients had significantly higher level of miR-155 than early stage patients (Fig. 1 and Table 1). Although early stage breast cancer patients had similar miR-125b level to healthy controls, late stage patients had on average 3.5-fold higher mean values of miR-125b than early stage patients and healthy controls ( $p<0.01$ , Fig. 1 and Table 1). Circulating miR-34 did not differ significantly in each comparison.

Table 1 depicted the correlation of the circulating miRNA levels in 56 patients, who had advanced ductal breast cancer and received pre-operative neoadjuvant chemotherapy, with clinical and histopathological factors. To determine the differences in the relative expression profiles, we performed univariate analyses of the Mann Whitney-U test. Expression levels of miR-125b and miR-155 were related to disease stage with higher miRNA levels in higher stage disease ( $p\leq 0.02$ ), but lack of significant association with estrogen receptor (ER), progesterone receptor (PR) and epidermal growth factor receptor 2 (HER2) status. Furthermore, blood levels of miR-125b were significantly associated with tumor grade and lymph node metastasis of the patients ( $p\leq 0.04$ ). In

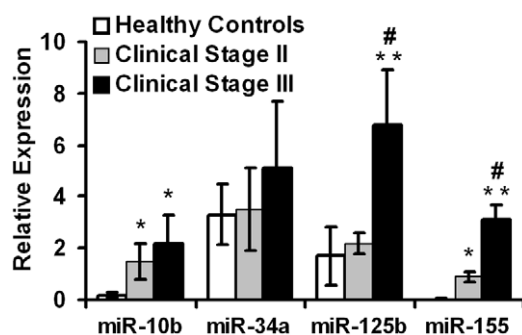

**Figure 1. Levels of circulating miRNAs in breast cancer patients and healthy controls.** Relative levels of circulating miR-10b, miR-34a, miR-125b and miR-155 were measured in healthy individuals ( $n=10$ ) and clinical stage II patients ( $n=35$ ) and stage III patients ( $n=21$ ) by quantitative RT-PCR. Data represented mean  $\pm$  SD. \* $p<0.05$ , \*\* $p<0.01$  compared to healthy controls; # $p<0.05$  compared to clinical stage II patients.

doi:10.1371/journal.pone.0034210.g001

contrast, expression of preoperative circulating miR-10b and miR-34a did not differ significantly in each comparison.

### Circulating miR-125b expression correlated with chemotherapeutic resistance of breast cancer patients

To determine whether the circulating miRNA expression levels were associated with chemotherapeutic efficacy, therapeutic response was evaluated by radiologic Response Evaluation Criteria in Solid Tumors (RECIST) as well as PCNA immunostaining for cell proliferation and TUNEL assay for apoptotic index in surgical specimens after chemotherapy. According to RECIST, 30 patients (54%) responded to chemotherapy with PR or CR; 26 patients (46%) were not responsive with SD or PD. Among the circulating miRNAs, only miR-125b was significantly associated with therapeutic response, exhibiting higher expression level in non-responsive patients ( $p=0.008$ , Table 2). In addition, breast cancers with high miR-125b expression prior to chemotherapy had higher percentage of proliferating cells and lower percentage of apoptotic cells in the corresponding surgical specimens obtained after neoadjuvant chemotherapy (Fig. 2A and B), suggesting that miR-125b expression in breast cancers was reversely correlated with apoptosis and proliferation inhibition induced by chemotherapy. Responders and non-responders for chemotherapy exhibited similar expression levels of miR-10b, 34a and 155 (Table 2).

### MiR-125b expression correlated with chemotherapeutic resistance in primary breast cancer cells

To further determine whether expression of miR-125b might be correlated with chemotherapeutic response, we isolated primary breast cancer cells from the biopsies of 11 breast cancer patients obtained prior to chemotherapy and correlated miR-125b expression levels with the efficacy of chemotherapy. Among all the 11 patients who received neoadjuvant chemotherapy, 6 patients had PR or CR, while the other 5 patients had PD or SD. The miR-125b expression levels were significantly higher in breast cancers with PD/SD than those with PR/CR ( $8.1\pm 2.3$  fold,  $p<0.001$ , Fig. 3A). Similarly, the IC<sub>50</sub> of 5-FU for breast cancer cells with PD/SD was significantly higher than those with PR/CR based on the dose-response curves ( $4.8\pm 2.7$  vs.  $20.4\pm 8.6$ ,  $p=0.002$ , Fig. 3B). Furthermore, knockdown of miR-125b using an antisense sequence significantly decreased IC<sub>50</sub> of 5-FU for breast cancers with PD/SD to the similar levels as those with PR/CR (Fig. 3B). These findings demonstrate that a higher expression level of miR-125b is associated with poor clinical response of primary breast cancers to chemotherapy.

### Involvement of miR-125b in chemotherapeutic resistance in breast cancer cells

In order to directly evaluate the contribution of miR-125b to chemotherapeutic response, we investigated the role of miR-125b in chemotherapy resistance in breast cancer cell lines, MCF-7, T47D, BT20 and MDA-MB-231. Among these cells, MCF-7 exhibited the lowest endogenous miR-125b (Fig. 4A), whereas MDA-MB-231 cells have  $3.1\pm 1.2$  (mean  $\pm$  SD) fold higher miR-125b expression than MCF-7 ( $p=0.03$ ). Based on the dose-response curves, the IC<sub>50</sub> of 5-FU was calculated as 8  $\mu$ M for MCF-7, 12  $\mu$ M for T47D, 10  $\mu$ M for BT20 and 20  $\mu$ M for MDA-MB-231, respectively. These concentrations were used in the following experiments. MiR-125b overexpression was induced using miRNA mimics. Compared to negative control, overexpression of miR-125b markedly inhibited 5-FU-induced cytotoxicity in all of the cell lines tested (Fig. 4B). Moreover, overexpression of

**Table 1.** Patients' characteristics at the time of primary diagnosis of breast cancer and correlation with serum miRNA levels.

| Characteristics    | Subgroups | n<br>(total 56) | Mean (Standard Deviation) |           |                    |            |
|--------------------|-----------|-----------------|---------------------------|-----------|--------------------|------------|
|                    |           |                 | miR-10b                   | miR-34a   | miR-125b           | miR-155    |
| Clinical stage     | II        | 35 (63%)        | 1.5 (0.7)                 | 3.5 (1.6) | <b>**2.2 (0.4)</b> | *0.9 (0.2) |
|                    | III       | 21 (38%)        | 2.2 (1.1)                 | 5.1 (2.6) | <b>**6.8 (2.1)</b> | *3.1 (0.6) |
| Grade              | II        | 32 (57%)        | 1.7 (0.6)                 | 3.8 (1.9) | <b>*2.6 (0.7)</b>  | 1.5 (0.4)  |
|                    | III       | 24 (43%)        | 2.1 (1.0)                 | 4.9 (1.2) | <b>*6.1 (1.9)</b>  | 2.3 (1.0)  |
| Distant metastasis | M0        | 20 (36%)        | 1.9 (0.9)                 | 3.9 (1.3) | 3.6 (1.1)          | 1.7 (0.5)  |
|                    | M1-2      | 36 (64%)        | 2.1 (0.9)                 | 4.5 (2.1) | 5.9 (1.8)          | 2.1 (1.2)  |
| Node metastasis    | N1-3      | 40 (71%)        | 1.5 (0.7)                 | 3.2 (1.1) | <b>*3.1 (0.5)</b>  | 1.9 (1.0)  |
|                    | N≥4       | 16 (29%)        | 2.3 (1.2)                 | 5.2 (2.6) | <b>*6.3 (1.1)</b>  | 2.1 (0.9)  |
| ER                 | Negative  | 13 (23%)        | 2.1 (1.1)                 | 4.1 (1.9) | 4.6 (1.3)          | 2.2 (1.1)  |
|                    | Positive  | 43 (77%)        | 1.9 (0.8)                 | 4.7 (1.9) | 4.1 (1.1)          | 1.9 (0.6)  |
| PR                 | Negative  | 19 (34%)        | 1.9 (0.5)                 | 3.9 (1.5) | 3.9 (0.9)          | 1.6 (0.5)  |
|                    | Positive  | 37 (66%)        | 2.2 (1.3)                 | 4.6 (2.1) | 4.8 (1.5)          | 2.3 (1.2)  |
| HER2               | Negative  | 46 (82%)        | 1.7 (0.8)                 | 3.8 (0.9) | 3.8 (1.4)          | 2.1 (0.9)  |
|                    | Positive  | 10 (18%)        | 2.0 (1.2)                 | 4.5 (1.3) | 4.2 (1.8)          | 1.7 (1.1)  |

ER, estrogen receptor; PR, progesterone receptor; HER2, human epidermal growth factor receptor 2 \*  $p < 0.05$ , \*\*  $p < 0.01$ .

doi:10.1371/journal.pone.0034210.t001

miR-125b dramatically decreased 5-FU-induced cytotoxicity and increased 5-FU resistance in a miR-125b dose-dependent manner in MCF-7 cells (Fig. 4C). Furthermore, the expression of miR-125b decreased 5-FU-induced cytotoxicity and increased 5-FU resistance under various concentration of 5-FU treatment in MCF-7 cells (Fig. 4D).

Based on the above observation, we further investigated whether reduced miR-125b may sensitize breast cancer cells to chemotherapy. MiR-125b antisense were transfected into MDA-MB-231 (a breast cancer cell line with high endogenous miR-125b), MCF-7 and FuR/MCF-7 (a MCF-7 breast cancer cell line induced to be resistant to 5-FU). Knockdown of miR-125b increased 5-FU induced cytotoxicity in these cells (Fig. 5A and 5B). More importantly, miR-125b antisense decreased IC<sub>50</sub> of FuR/MCF-7 to the similar level of wild type MCF-7 (Fig. 5B). These results indicated that miR-125b played an important role in chemotherapeutic resistance in breast cancer cells.

**Table 2** Correlation of serum miRNA levels and response to chemotherapy.

|                    |       | n<br>(total 56) | Mean (Stand Deviation) |           |                    |           |
|--------------------|-------|-----------------|------------------------|-----------|--------------------|-----------|
|                    |       |                 | miR-10b                | miR-34a   | miR-125b           | miR-155   |
| Treatment response | CR+PR | 30 (54%)        | 1.9 (0.8)              | 4.1 (1.3) | <b>**1.8 (0.3)</b> | 1.9 (0.5) |
|                    | SD+PD | 26 (46%)        | 2.0 (0.9)              | 4.3 (1.6) | <b>**7.4 (1.9)</b> | 2.1 (0.9) |
| PCNA               | Low   | 35 (63%)        | 1.5 (0.5)              | 3.5 (1.2) | <b>**1.9 (0.6)</b> | 1.8 (0.6) |
|                    | High  | 21 (38%)        | 2.5 (1.4)              | 4.7 (1.9) | <b>**6.9 (2.1)</b> | 2.2 (0.9) |
| Apoptotic index    | Low   | 22 (39%)        | 1.9 (0.7)              | 3.9 (1.5) | <b>*6.3 (1.3)</b>  | 2.2 (0.9) |
|                    | High  | 34 (61%)        | 2.1 (1.1)              | 4.5 (2.2) | <b>*2.9 (0.9)</b>  | 1.6 (1.0) |

CR, complete response; PR, partial response; SD, stable disease; PD, disease progression \*  $p < 0.05$ , \*\*  $p < 0.01$

doi:10.1371/journal.pone.0034210.t002

### E2F3 Is a Direct Target of miR-125b in Breast Cancer Cells

To gain further insight into the function of miR-125b in chemotherapeutic resistance in breast cancer, we used the prediction programs TargetScan Human 5.1 [21], PicTar [22] and DIANA microT v3.0 [23] to identify potential miR-125b target genes. There are 87 predicted targets by all the three prediction algorithms (Table S1). Functional annotation of the 87 highly conserved target genes by DAVID (<http://david.abcc.ncifcrf.gov/>) revealed enrichment of genes involved with transcription regulation, protein transport, chromatin modification, cell cycle and apoptosis. The three public miRNA databases all predicted that E2F3 might be a target for miR-125b. We were particularly interested in E2F3 because of its essential roles in cell proliferation and apoptosis. Overexpression of miR-125b in MCF-7 cells significantly down-regulated E2F3 protein level (Fig. 6A). In contrast, knockdown of miR-125b up-regulated the expression of E2F3 in MDA-MB-231 cells, which have high expression of endogenous miR-125b (Fig. 6B). These results indicated that E2F3 expression was regulated by miR-125b in breast cancer cells.

To determine if E2F3 is a direct target of miR-125b, a luciferase reporter with E2F 3' UTR was constructed and co-transfected with miRNA mimics into MCF-7 cells (Fig. 6C). Compared to scramble control, overexpression of miR-125b decreased the luciferase activity of the reporter with E2F3 3'UTR by about 60% ( $p = 0.002$ , Fig. 6C). Mutations in the seed sequence of miR-125b target site restored the repressed luciferase activity (Fig. 6C), indicating that E2F3 was a direct target of miR-125b.

### Discussion

The expanding knowledge of the molecular pathogenesis of cancer is providing new targets for disease characterization, which might also be used as new markers to select patients for better clinical management. In particular, there are a growing number of studies on miRNAs, which are classified as oncogenes or tumor-suppressor genes and have a pivotal role in progression and prognosis of different tumors [9]. In the present study, we demonstrate that higher circulating miR-125b level is correlated to

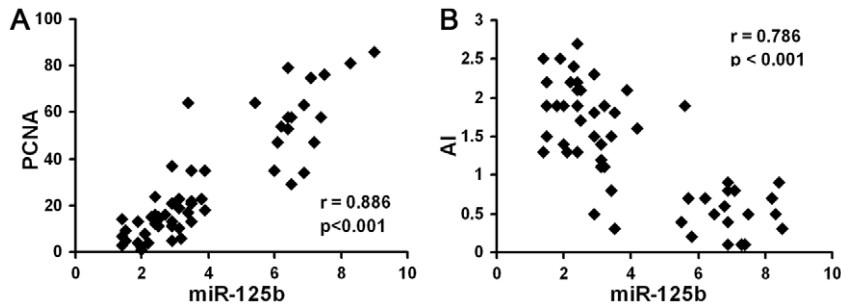

**Figure 2. Circulating miR-125b expression correlated to chemotherapeutic response in breast cancer patients.** Surgically removed tumor samples were obtained after neoadjuvant chemotherapy. (A) Percentage of PCNA positive cells was determined by immunohistochemical staining. (B) Apoptotic index (AI) was expressed as the percentage of TUNEL-positive tumor cells. Circulating miR-125b levels were determined by quantitative real-time PCR. doi:10.1371/journal.pone.0034210.g002

more advanced ductal carcinoma of the breast and resistance for adjuvant chemotherapy. In addition, miR-125b expression was reversely correlated with apoptosis and proliferation inhibition induced by chemotherapy. Furthermore, breast cancer cells expressing a higher level of miR-125b were more resistant; conversely, reducing miR-125b level sensitized breast cancer cells to chemotherapy. E2F3, as a direct target of miR-125b in breast cancer cells, may be involved in miR-125b-mediated chemotherapeutic response. These data suggest that circulating miR-125b contributes to chemotherapeutic resistance of breast cancer and serves as a potential marker predicting chemotherapeutic response and a target for overcoming chemotherapeutic resistance.

The miRNAs currently analyzed were selected from the comparison of miRNA expression patterns in normal and tumoral breast tissues, as well as from the results of several preclinical studies, suggesting their role in tumor progression and sensitivity [15–18,24,25]. MiR-125b was reported to have complicated functions as either oncogene-like or tumor suppressor-like in different cancer types or cell lines. Up-regulation of miR-125b is not only observed in pancreatic cancer [26], prostate cancer [27], and acute myeloid leukemia [28], but also promotes cancer cell proliferation and suppresses p53-dependent apoptosis in human neuroblastoma cells [29]. However, miR-125b has been reported to be down-regulated in ovarian carcinoma [30], thyroid carcinoma [31], and oral squamous cell carcinoma [32] and has

been shown to inhibit cell proliferation and cell cycle progression in these cancers. Recently, miR-125b was reported to exhibit under-expressed in breast cancer tissues [33,34]. However, a precise study using microdissection demonstrated that miR-125

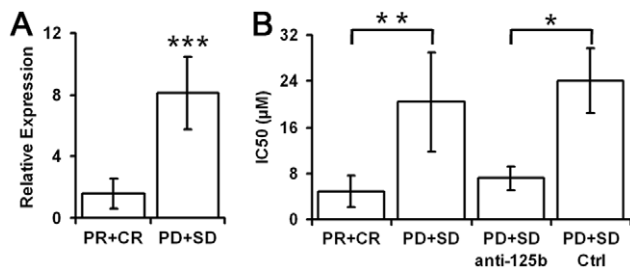

**Figure 3. MiR-125b expression correlated with chemotherapeutic resistance in primary breast cancer cells.** (A) MiR-125b expression was determined by quantitative RT-PCR. (B) Primary breast cancer cells were treated with 5-FU for 48 h with or without miRNA antisense transfection (100 nM). IC50 was calculated as concentration of 5-FU to produce 50% cell inhibition (Materials and Methods). Data represented mean  $\pm$  SD of primary breast cancer cell cultures from 5 patients with partial or complete response (PR + CR) and from 4 patients with disease progression or stabilization (PD + SD), \* $p$ =0.01, \*\* $p$ =0.002, \*\*\* $p$ <0.001. doi:10.1371/journal.pone.0034210.g003

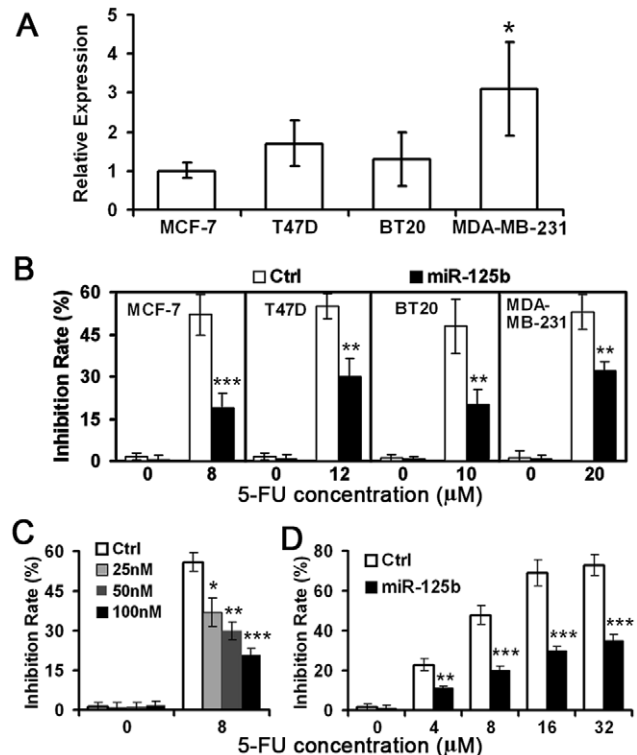

**Figure 4. Involvement of miR-125b in chemotherapeutic resistance in breast cancer cells.** (A) Relative expression levels of endogenous miR-125b were measured in breast cancer cell lines by quantitative RT-PCR. Data represented mean  $\pm$  SD. \* $p$ <0.05 compared to MCF-7. (B) Breast cancer cells, MCF-7, T47D, BT20 and MDA-MB-231, were transfected with 100 nM pre-miR-125b and treated with the indicated concentrations of 5-FU for 48 h. A scramble pre-miRNA sequence served as a negative control (Ctrl). MCF-7 cells were transfected with 0, 25, 50, and 100 nM pre-miR-125b and then incubated with 8  $\mu$ M 5-FU (C) or were treated with 0, 4, 8, 16, and 32  $\mu$ M 5-FU for 48 h after transfection of 100 nM miRNA mimics (D). Cell variability was determined by trypan blue dye exclusion assays. Data represented mean  $\pm$  SD of triplicate experiments. \* $p$ <0.05, \*\* $p$ <0.01, \*\*\* $p$ <0.001 compared to Ctrl. doi:10.1371/journal.pone.0034210.g004

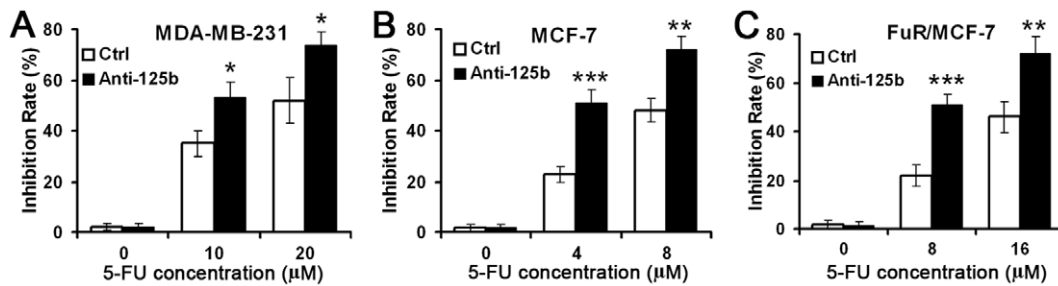

**Figure 5. Knockdown of miR-125b sensitized breast cancer cells to chemotherapy.** MDA-MB-231 (A), MCF-7 and 5-FU resistant FuR/MCF-7 (B) cells were transfected with 100 nM anti-miR-125b or anti-scramble control (Ctrl). Then the cells were treated with the indicated concentrations of 5-FU for 48 h. Data represented mean  $\pm$  SD of triplicate experiments. \* $p$ <0.05, \*\* $p$ <0.01, \*\*\* $p$ <0.001 compared to Ctrl. doi:10.1371/journal.pone.0034210.g005

was expressed in basal myoepithelial cells but not in luminal ductal cells [35]. The under-expression of miR-125b in breast cancer tissue may be due to loss of myoepithelial cells in cancer tissue instead of downregulation of miR-125b in cancer cells. Moreover, other recent studies reported that miR-125b may act as an oncogene in human breast cancer cells [36] and was related to resistance of breast cancer cells to paclitaxel [37]. In our study we show that miR-125b was associated with advanced breast cancer and increased chemotherapeutic resistance, acting primarily as an oncogene. One possible explanation for this controversy is the known diverse nature of miRNA target genes. The net effect of changes in the expression of a miRNA appears to be the sum of all impacts on its targets in a cell type-specific and phenotype-specific manner [38]. The exact association of miR-125b expression and

breast tumor progression is still unclear. Further investigations with large patient samples and well designed laboratory studies should be performed in the future to clarify the role of miR-125b in human breast cancer development.

To achieve a more effective and individualised chemotherapeutic treatment of breast cancer patients in the future, it is essential to increase our knowledge in mechanisms responsible for drug resistance, and to define reliable indicators for response to therapy. Commonly accepted prognostic factors are lymph node status, tumor size, histological grade, and patient age. Predictors for the effect of endocrine treatment, currently used in clinical routine, are estrogen and progesterone receptor status, and c-erbB-2 for the effect of trastuzumab [39]. Useful markers for resistance and/or sensitivity of chemotherapy (FEC and/or antacyclin based regimes) have not, so far, been identified. Some markers have shown promising results in a limited number of studies, e.g. Ki67 [40], p53 [41], multidrug resistance-associated protein [42] and circulating tumor cells [43,44]. Recent studies have revealed that a large number of miRNAs are deregulated in drug resistant or sensitive cancer cell lines [45]. For example, Kovalchuk *et al.* [46] found 137 differentially regulated miRNAs (63 upregulated and 75 downregulated) when comparing doxorubicine-resistant and -sensitive breast cancer cell lines. Circulating miRNAs have been identified in the serum/plasma and can be potentially used as biomarkers for tumor characterization and cancer prognosis [11,47]. To the best of our knowledge, this is the first study investigating the association of circulating miRNAs and chemotherapeutic response. We identified miR-125b as a potential marker predicting chemotherapeutic resistance in breast cancers.

It is well established that miRNAs function via repression of target gene translation. To date, several targets of miR-125b have been identified. One recent study showed that pro-apoptotic Bcl-2 antagonist killer 1 (Bak1) was a direct target of miR-125b, and suppression of Bak1 gene expression through overexpression of miR-125b inhibited Taxol-induced apoptosis and led to an increased resistance to Taxol in breast cancer cells [37]. Tumor suppressor p53 was directly targeted by miR-125b, and overexpression of miR-125b inhibited p53-dependent apoptosis in human neuroblastoma cells and human lung fibroblast cells [48]. A report showed that ErbB2/HER2 and ErbB3/HER3 were both targets of miR-125b in breast cancer SKBr3 cells [49]. However, we could not find a significant association between circulating miR-125 level and HER2 status in breast cancer patients. Consistent with our results, miR-125b did not induce ErbB2/HER2 down-regulation in either prostate cancer cells or breast cancer cells including SKBr3 cells in other reports [27,37]. Utilizing multiple target prediction tools, we identified 87 potential targets of miR-125b including BMPR1b, an experimentally

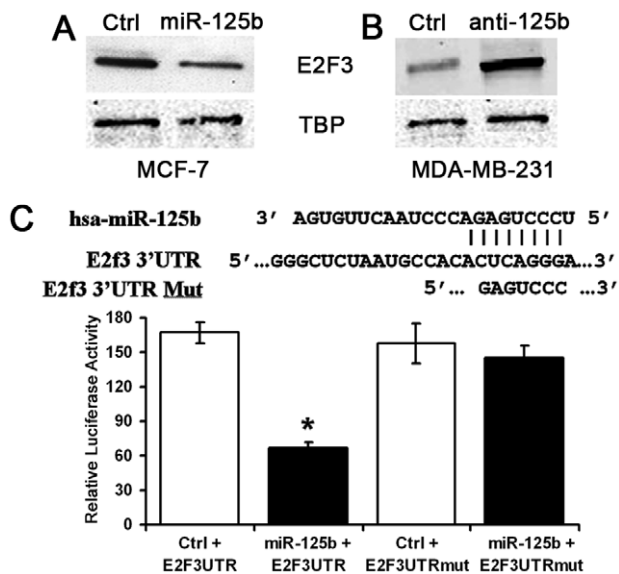

**Figure 6. E2F3 was a direct target of miR-125b in breast cancer cells.** (A) MCF-7 cells were transfected with 100 nM pre-miR-125b or pre-scramble control (Ctrl). (B) MDA-MB-231 cells were transfected with 100 nM anti-miR-125b or anti-scramble control (Ctrl). Twenty-four hours after transfection, nuclear lysates were prepared for Western blotting with an antibody against E2F3, and TBP was used as a loading control. (C) MCF-7 cells were co-transfected with luciferase reporter plasmids with intact or mutant 3'UTR of E2F3, pre-miR-125 or pre-scramble control (Ctrl). Luciferase activity was measured at 48 h post-transfection using a dual luciferase reporter assay. The results were expressed as relative luciferase activity (firefly/renilla luciferase). Data represented mean  $\pm$  SD of triplicate experiments. \* $p$ =0.002. doi:10.1371/journal.pone.0034210.g006

confirmed target of miR-125b [50] (Table S1). However, several other recently defined targets (MUC1 [51], HER2 [49], BAK1 [37] and ETS1 [17]) are not among our list, reflecting a challenge of miRNA target identification [52]. By combining the bioinformatic and experimental approaches, our results indicated that E2F3 expression was regulated by miR-125b through a target site in the 3'UTR in breast cancer cells. E2F3 family of transcription factors plays a critical role in regulating cell cycle progression and proliferation [53,54]. Furthermore, E2F3, and in some settings E2F1, induce apoptosis through p53-dependent or -independent pathways [54,55]. E2F3 pathway has been associated with chemotherapy sensitivity in ER-negative cancers [56]. Thus, it is not surprising that E2F3 be a critical target that mediated the chemotherapeutic resistance in miR-125b overexpressing breast cancer cells.

In conclusion, high miR-125b expression in serum was associated with chemotherapeutic resistance in advanced ductal carcinoma of breast, and the overexpression of miR-125b caused a marked inhibition of anticancer drug activity and increased resistance in breast cancer cells *in vitro*. Because only 5-FU was used in our *in vitro* studies, further investigation will be needed to validate the role of miR-125b with other chemotherapeutic reagents. In addition, we demonstrated that E2F3 was a direct target of miR-125b in breast cancer cells. These data provided evidence that miR-125b may allow stratification for adjuvant therapy, thus offering a potential new biomarker for treatment selection and personalized therapy.

## Materials and Methods

### Ethics Statement

The Study obtained the permission of the ethics committee of Dalian medical university and all patients provided written informed consent.

### Patients

Patients receiving chemotherapy treatment for primary invasive ductal carcinoma of the breast between 01/2009 and 12/2010 at the Department of General Surgery were reviewed. A total of 56 patients (median age 55, range 36–78) were included in the study. All the patients underwent pre-operative neoadjuvant chemotherapy with an association of 5-Fluorouracil (5-FU), Epirubicin and Cyclophosphamide (FEC) for 4–6 cycles. Before starting the treatment, patients received a baseline blood draw for miRNA expression profiling. Tumor assessment was performed every 3 months by CT-scan and/or chest X-ray coupled with abdomen ultrasound depending on those used at baseline. Subsequently, the patients underwent total mastectomy or breast reservation. The patients with breast reservation received post-operative radiotherapy. Treatment response was assessed by the RECIST criteria [57]. Patients achieving complete (CR) or partial (PR) response were considered as responder; disease stabilization (SD) or disease progression (PD) considered as non-responder. According to the clinical response of neoadjuvant chemotherapy, adjuvant FEC or Taxotere was selectively administered in the patients with PR/CR or PD/SD. Endocrine therapy was administered for patients with positive hormonal receptor. Additionally, 10 age-matched healthy women with no history of cancer and in good health based on self-report were recruited as controls.

### Extraction of total RNA

The *mirVana* PARIS kit (Ambion) was used to isolate total RNA from human blood serum according to manufacturer's instructions. Four hundred  $\mu$ L of serum samples were incubated with an

equal volume of Denaturation Solution for 5 minutes on ice. The RNA extraction was performed by acid-phenol:chloroform, and the precipitation was carried out by ethanol and a filter cartridge. The extracted RNA was eluted in 100  $\mu$ L of preheated Elution Solution and measured on a NanoDrop ND-1000 Spectrophotometer (Thermo Scientific). The RNA samples were immediately stored at  $-80^{\circ}\text{C}$  until use.

### Quantitative real-time PCR

For quantitative real-time PCR, the miRNA-specific TaqMan MicroRNA Assays (Applied Biosystems) for miR16 (reference miR), miR10b, miR34a, miR125b and miR155 were used as described by the manufacturer. Briefly, 100 ng of total RNA was reverse transcribed using primers specific to each miRNA target followed by real-time PCR on a 7900 HT Fast Real-Time PCR System using TaqMan miRNA primers and probes (Applied Biosystems). Triplicate samples, validated endogenous controls and interassay controls were used throughout. MiRNA expression levels were calculated by the  $\Delta\text{Ct}$  method:  $\Delta\text{Ct} = \text{mean value Ct (reference miR-16)} - \text{mean value Ct (miRNA of interest)}$ . The relative expression of miRNA of interest corresponded to the  $2^{-\Delta\text{Ct}}$  value.

### Immunohistochemistry and Terminal deoxynucleotidyl transferase (TdT)-mediated dUTP labeling (TUNEL)

The level of PCNA was detected by immunohistochemistry staining in paraffin-embedded tissue sections. Mouse monoclonal anti-PCNA antibody (ab29, Abcam) (1:6000 dilutions) were used as primary antibody. The mouse IgG was added as the negative control.

TUNEL assay was done using an In situ Apoptosis Detection Kit (R&D Systems). Briefly, after digesting with Protease K, TdT reaction mix was applied to the cells for incubation at  $37^{\circ}\text{C}$  for 60 min, followed by incubation with streptavidin horseradish peroxidase for 10 min. The final reaction of the product was visualized by 3, 3'-diaminobenzidine. Approximately 1,000 tumor cells were counted ( $400\times$ ) in each section, and apoptotic index (AI) was expressed as the percentage of TUNEL-positive tumor cells.

The proportion of positive tumor cells was evaluated by two pathologists who were blinded to the study endpoints. For the statistical purpose, we divided cases into two groups: low expression (PCNA $\leq$ 25% or AI $\leq$ 1%) and high expression (PCNA $>$ 25% or AI $>$ 1%) [15].

### Cell culture and drug treatment

Human breast cancer cell lines, MCF-7, T47D, BT20 and MDA-MB-231, were purchased from American Type Culture Collection (ATCC) and grown according to standard protocols. The different inhibitory concentrations of 5-FU were determined by generating dose-response curves after treating the cells with increasing concentrations of 5-FU and analyzing the cell sensitivity using trypan blue dye exclusion assays. Briefly, the cell suspension was appropriately diluted with 0.4% trypan blue dye (Sigma-Aldrich) and hemacytometer was used to estimate the percentage of unstained treated cells compared to the control cells. The inhibition rate was calculated as follows:  $\text{Inhibition rate} = (1 - \text{unstained treated cells/control cells}) \times 100$ . The IC<sub>50</sub> (concentration of 5-FU to produce 50% cell inhibition) was determined and used for further analysis. All experiments were carried in triplicate.

5-FU resistant MCF-7 (FuR/MCF-7) cells were selected in stepwise increasing concentrations beginning at 0.1  $\mu\text{M}$  and ending at 20  $\mu\text{M}$  of 5-FU (Sigma). Cells did not receive next

treatment until they had got an 80% confluence after each treatment. Despite massive cell deaths among the sensitive MCF-7 cells under treatment, the cultures were maintained by regular changes of medium intermittently increasing the 5-FU concentration until the surviving cells recovered a normal growth pattern in the medium with 1  $\mu$ M 5-FU, which was included in the culture medium for MCF-7/5-FU to maintain the drug resistance. The cells were maintained in 5-FU free medium at least 2 weeks before each experiment.

Primary breast cancer cells were isolated from biopsy samples using the Cancer Cell Isolation kit (Panomics) following the manufacturer's protocol. Briefly, tumor pieces of <2 mm size were seeded into six-well culture plates and cultured in RPMI 1640 supplemented with 20% fetal bovine serum, 1% L-glutamine, 1% MEM nonessential amino acid, and 1% antibiotic/penicillin-streptomycin solution. Cells were maintained at 37°C in a humidified atmosphere containing 5% CO<sub>2</sub>. Cells were harvested with 0.1% trypsin/0.05% EDTA when the cultures had reached ~80% confluence. These cells were expanded for three to four subsequent passages and thereafter used for determining miR-125b expression level and dose-response curves to 5-FU.

### Luciferase reporter assay and transfection

Full length 3'UTR of E2F3 gene was amplified by PCR and inserted into the firefly luciferase reporter immediately downstream from the stop codon. Mutation in miR-125b target site was introduced by PCR amplification using appropriate oligonucleotides. For luciferase assays, MCF-7 cells were transfected in 6-well plates, using Lipofectamine LTX, with firefly luciferase reporter vectors (0.7  $\mu$ g), together with a Renilla luciferase control vector (0.07  $\mu$ g) (Promega). For each well, 25 nM miR-125b mimic or a scramble control miRNA was co-transfected with the reporter constructs. Luciferase activity was measured 24 hrs after transfection using the Dual Luciferase Reporter Assay System (Promega). Firefly luciferase activity was normalized to Renilla luciferase activity.

MiR-125b overexpression and inhibition were achieved by transfection of miRIDIAN miRNA mimic (Thermo Scientific) and LNA antisense oligonucleotides (Exiqon), respectively. Transfection was performed using Lipofectamine RNAiMAX reagent (Invitrogen); reverse transfection procedure was performed according to the manufacture's instructions.

### References

- Jemal A, Siegel R, Ward E, Hao Y, Xu J, et al. (2009) Cancer statistics, 2009. *CA Cancer J Clin* 59: 225–249.
- He M, Guo Q, Hu G (2011) Reversed urban-rural differences in breast cancer mortality (China, 2002–2008). *Breast Cancer Res Treat* 126: 231–234.
- Chen LP, Cai SM, Fan JX, Li ZT (1995) PEBA regimen (cisplatin, etoposide, bleomycin, and adriamycin) in the treatment of drug-resistant choriocarcinoma. *Gynecol Oncol* 56: 231–234.
- Pattingre S, Tassa A, Qu X, Garuti R, Liang XH, et al. (2005) Bcl-2 antiapoptotic proteins inhibit Beclin 1-dependent autophagy. *Cell* 122: 927–939.
- Tan M, Jing T, Lan KH, Neal CL, Li P, et al. (2002) Phosphorylation on tyrosine-15 of p34(Cdc2) by ErbB2 inhibits p34(Cdc2) activation and is involved in resistance to taxol-induced apoptosis. *Mol Cell* 9: 993–1004.
- Lange C, Yee D (2011) Killing the second messenger: targeting loss of cell cycle control in endocrine resistant breast cancer. *Endocr Relat Cancer* 18: C19–24.
- Senderowicz AM (2003) Novel direct and indirect cyclin-dependent kinase modulators for the prevention and treatment of human neoplasms. *Cancer Chemother Pharmacol* 52 Suppl 1: S61–73.
- Doench JG, Sharp PA (2004) Specificity of microRNA target selection in translational repression. *Genes Dev* 18: 504–511.
- Esquela-Kerscher A, Slack FJ (2006) Oncomirs – microRNAs with a role in cancer. *Nat Rev Cancer* 6: 259–269.
- Cho WC (2007) OncomiRs: the discovery and progress of microRNAs in cancers. *Mol Cancer* 6: 60.
- Zhao H, Shen J, Medico L, Wang D, Ambrosone CB, et al. (2010) A pilot study of circulating miRNAs as potential biomarkers of early stage breast cancer. *PLoS ONE* 5: e13735.
- Schwarzenbach H, Hoon DS, Pantel K (2011) Cell-free nucleic acids as biomarkers in cancer patients. *Nat Rev Cancer* 11: 426–437.
- Yu DC, Li QG, Ding XW, Ding YT (2011) Circulating MicroRNAs: Potential Biomarkers for Cancer. *Int J Mol Sci* 12: 2055–2063.
- Cho WC (2011) Circulating MicroRNAs as Minimally Invasive Biomarkers for Cancer: Theragnosis and Prognosis. *Front Genet* 2: 7.
- Ma L (2010) Role of miR-10b in breast cancer metastasis. *Breast Cancer Res* 12: 210.
- Mudduluru G, Ceppi P, Kumarswamy R, Scagliotti GV, Papotti M, et al. (2011) Regulation of Axl receptor tyrosine kinase expression by miR-34a and miR-199a/b in solid cancer. *Oncogene* 30: 2888–2899.
- Zhang Y, Yan LX, Wu QN, Du ZM, Chen J, et al. (2011) miR-125b Is Methylated and Functions as a Tumor Suppressor by Regulating the ETS1 Proto-oncogene in Human Invasive Breast Cancer. *Cancer Res* 71: 3552–3562.
- Kong W, He L, Coppola M, Guo J, Esposito NN, et al. (2010) MicroRNA-155 regulates cell survival, growth, and chemosensitivity by targeting FOXO3a in breast cancer. *J Biol Chem* 285: 17869–17879.
- Zhao JJ, Lin J, Yang H, Kong W, He L, et al. (2008) MicroRNA-221/222 negatively regulates estrogen receptor alpha and is associated with tamoxifen resistance in breast cancer. *J Biol Chem* 283: 31079–31086.

### Western Blot

Nuclear extracts were made using the NE-PER kit (Pierce). E2F3 and TATA binding protein (TBP, nuclear protein loading control) were detected using the anti-E2F3 (N-20, Santa Cruz) and anti-TBP (1TBP18, Abcam) antibodies. For immunoblotting, cell lysates (20  $\mu$ g) were resolved on 15% SDS-polyacrylamide gels and transferred onto polyvinylidene difluoride membranes (Hybond-P; Amersham Biosciences). Membranes were blocked with 2% non-fat milk for 1 h and then incubated with the primary antibody followed by a horseradish peroxidase-conjugated secondary antibody, and ECL-PLUS Detection System (Amersham Biosciences) was used as substrate for chemiluminescent detection. The band intensity was quantitated using Image J software. Data were normalized to the intensity of TBP bands.

### Statistical analysis

The statistical analyses were performed using the SPSS software package, version 18.0. The chi square or two-tailed Fischer's exact test was used to identify potential associations of miRNA concentrations in blood serum with the clinical and histopathological risk factors of the breast cancer patients. For nonparametric comparisons, univariate analyses of the Mann Whitney-U test of two independent variables and bivariate analyses of the Spearman-Rho test were used. All experiments for cell cultures were performed at least triplicate and evaluated by Student's *t* test. Data were presented as mean  $\pm$  standard deviation (SD). *P* < 0.05 in all cases was considered statistically significant.

### Supporting Information

**Table S1** Predicted targets of miR-125b by all the three prediction algorithms (n = 87) (PDF)

### Author Contributions

Conceived and designed the experiments: HJW ZYW HFL. Performed the experiments: HJW LD LC KJL HFL. Analyzed the data: HJW GT. Wrote the paper: HJW.

20. Fujita Y, Kojima K, Hamada N, Ohhashi R, Akao Y, et al. (2008) Effects of miR-34a on cell growth and chemoresistance in prostate cancer PC3 cells. *Biochem Biophys Res Commun* 377: 114–119.
21. Friedman RC, Farh KK, Burge CB, Bartel DP (2009) Most mammalian mRNAs are conserved targets of microRNAs. *Genome Res* 19: 92–105.
22. Krek A, Grun D, Poy MN, Wolf R, Rosenberg L, et al. (2005) Combinatorial microRNA target predictions. *Nat Genet* 37: 495–500.
23. Maragkakis M, Reczko M, Simossis VA, Alexiou P, Papadopoulos GL, et al. (2009) DIANA-microT web server: elucidating microRNA functions through target prediction. *Nucleic Acids Res* 37: W273–276.
24. Corcoran C, Friel AM, Duffy MJ, Crown J, O'Driscoll L (2011) Intracellular and extracellular microRNAs in breast cancer. *Clin Chem* 57: 18–32.
25. Hannafon BN, Sebastiani P, de Las Morenas A, Lu J, Rosenberg CL (2011) Expression of microRNA and their gene targets are dysregulated in preinvasive breast cancer. *Breast Cancer Res* 13: R24.
26. Bloomston M, Frankel WL, Petrocca F, Volinia S, Alder H, et al. (2007) MicroRNA expression patterns to differentiate pancreatic adenocarcinoma from normal pancreas and chronic pancreatitis. *JAMA* 297: 1901–1908.
27. Shi XB, Xue L, Yang J, Ma AH, Zhao J, et al. (2007) An androgen-regulated miRNA suppresses Bak1 expression and induces androgen-independent growth of prostate cancer cells. *Proc Natl Acad Sci U S A* 104: 19983–19988.
28. Tian S, Huang S, Wu S, Guo W, Li J, et al. (2010) MicroRNA-1285 inhibits the expression of p53 by directly targeting its 3' untranslated region. *Biochem Biophys Res Commun* 396: 435–439.
29. Xia HF, He TZ, Liu CM, Cui Y, Song PP, et al. (2009) MiR-125b expression affects the proliferation and apoptosis of human glioma cells by targeting Bmf. *Cell Physiol Biochem* 23: 347–358.
30. Iorio MV, Visone R, Di Leva G, Donati V, Petrocca F, et al. (2007) MicroRNA signatures in human ovarian cancer. *Cancer Res* 67: 8699–8707.
31. Visone R, Pallante P, Vecchione A, Cirombella R, Ferracin M, et al. (2007) Specific microRNAs are downregulated in human thyroid anaplastic carcinomas. *Oncogene* 26: 7590–7595.
32. Veerla S, Lindgren D, Kvist A, Frigyesi A, Staaf J, et al. (2009) MiRNA expression in urothelial carcinomas: important roles of miR-10a, miR-222, miR-125b, miR-7 and miR-452 for tumor stage and metastasis, and frequent homozygous losses of miR-31. *Int J Cancer* 124: 2236–2242.
33. Iorio MV, Ferracin M, Liu CG, Veronese A, Spizzo R, et al. (2005) MicroRNA gene expression deregulation in human breast cancer. *Cancer Res* 65: 7065–7070.
34. Ozek NS, Tuna S, Erson-Bensan AE, Severcan F (2010) Characterization of microRNA-125b expression in MCF7 breast cancer cells by ATR-FTIR spectroscopy. *Analyst* 135: 3094–3102.
35. Bockmeyer CL, Christgen M, Muller M, Fischer S, Ahrens P, et al. (2011) MicroRNA profiles of healthy basal and luminal mammary epithelial cells are distinct and reflected in different breast cancer subtypes. *Breast Cancer Res Treat*.
36. Shimono Y, Zabala M, Cho RW, Lobo N, Dalerba P, et al. (2009) Downregulation of miRNA-200c links breast cancer stem cells with normal stem cells. *Cell* 138: 592–603.
37. Zhou M, Liu Z, Zhao Y, Ding Y, Liu H, et al. (2010) MicroRNA-125b confers the resistance of breast cancer cells to paclitaxel through suppression of proapoptotic Bcl-2 antagonist killer 1 (Bak1) expression. *J Biol Chem* 285: 21496–21507.
38. Gebeshuber CA, Zatloukal K, Martinez J (2009) miR-29a suppresses tristetruprolin, which is a regulator of epithelial polarity and metastasis. *EMBO Rep* 10: 400–405.
39. Weigel MT, Dowsett M (2010) Current and emerging biomarkers in breast cancer: prognosis and prediction. *Endocr Relat Cancer* 17: R245–262.
40. Faneyte IF, Schrama JG, Peterse JL, Remijnse PL, Rodenhuis S, et al. (2003) Breast cancer response to neoadjuvant chemotherapy: predictive markers and relation with outcome. *Br J Cancer* 88: 406–412.
41. Geisler S, Borresen-Dale AL, Johnsen H, Aas T, Geisler J, et al. (2003) TP53 gene mutations predict the response to neoadjuvant treatment with 5-fluorouracil and mitomycin in locally advanced breast cancer. *Clin Cancer Res* 9: 5582–5588.
42. Burger H, Foekens JA, Look MP, Meijer-van Gelder ME, Klijn JG, et al. (2003) RNA expression of breast cancer resistance protein, lung resistance-related protein, multidrug resistance-associated proteins 1 and 2, and multidrug resistance gene 1 in breast cancer: correlation with chemotherapeutic response. *Clin Cancer Res* 9: 827–836.
43. Hartkopf AD, Wagner P, Wallwiener D, Fehm T, Rothmund R (2011) Changing levels of circulating tumor cells in monitoring chemotherapy response in patients with metastatic breast cancer. *Anticancer Res* 31: 979–984.
44. Sieuwerts AM, Mostert B, Bolt-de Vries J, Peeters D, de Jongh FE, et al. (2011) mRNA and microRNA expression profiles in circulating tumor cells and primary tumors of metastatic breast cancer patients. *Clin Cancer Res* 17: 3600–3618.
45. Noonan EJ, Place RF, Li LC (2011) MicroRNAs in Predicting Radiotherapy and Chemotherapy Response. In: Cho WC, ed. *MicroRNAs in cancer translational research*. New York: Springer. pp 415–447.
46. Kovalchuk O, Filkowski J, Meservy J, Ilynskyy Y, Tryndyak VP, et al. (2008) Involvement of microRNA-451 in resistance of the MCF-7 breast cancer cells to chemotherapeutic drug doxorubicin. *Mol Cancer Ther* 7: 2152–2159.
47. Heneghan HM, Miller N, Kerin MJ (2011) Circulating microRNAs: promising breast cancer Biomarkers. *Breast Cancer Res* 13: 402.
48. Le MT, Teh C, Shyh-Chang N, Xie H, Zhou B, et al. (2009) MicroRNA-125b is a novel negative regulator of p53. *Genes Dev* 23: 862–876.
49. Scott GK, Goga A, Bhaumik D, Berger CE, Sullivan CS, et al. (2007) Coordinate suppression of ERBB2 and ERBB3 by enforced expression of microRNA miR-125a or miR-125b. *J Biol Chem* 282: 1479–1486.
50. Feng N, Xu B, Tao J, Li P, Cheng G, et al. (2011) A miR-125b binding site polymorphism in bone morphogenetic protein membrane receptor type IB gene and prostate cancer risk in China. *Mol Biol Rep*.
51. Rajabi H, Jin C, Ahmad R, McClary C, Joshi MD, et al. (2010) MUCIN 1 ONCOPROTEIN EXPRESSION IS SUPPRESSED BY THE miR-125b ONCOMIR. *Genes Cancer* 1: 62–68.
52. Barbato C, Arisi I, Frizzo ME, Brandi R, Da Sacco L, et al. (2009) Computational challenges in miRNA target predictions: to be or not to be a true target? *J Biomed Biotechnol* 2009: 803069.
53. Iaquinta PJ, Lees JA (2007) Life and death decisions by the E2F transcription factors. *Curr Opin Cell Biol* 19: 649–657.
54. Polager S, Ginsberg D (2008) E2F – at the crossroads of life and death. *Trends Cell Biol* 18: 528–535.
55. Martinez LA, Goluszko E, Chen HZ, Leone G, Post S, et al. (2010) E2F3 is a mediator of DNA damage-induced apoptosis. *Mol Cell Biol* 30: 524–536.
56. Tordai A, Wang J, Andre F, Liedtke C, Yan K, et al. (2008) Evaluation of biological pathways involved in chemotherapy response in breast cancer. *Breast Cancer Res* 10: R37.
57. Therasse P, Arbuck SG, Eisenhauer EA, Wanders J, Kaplan RS, et al. (2000) New guidelines to evaluate the response to treatment in solid tumors. European Organization for Research and Treatment of Cancer, National Cancer Institute of the United States, National Cancer Institute of Canada. *J Natl Cancer Inst* 92: 205–216.
